# Supplementary material for: Spotting disease disrupts the microbiome of infected purple sea urchins, Strongylocentrotus purpuratus
Source: PubMed Central journal article supplement (PMC10765733; doi:10.1186/s12866-023-03161-9), 2024-01-04
Supplement: 12866_2023_3161_MOESM1_ESM.pdf [file 12866_2023_3161_MOESM1_ESM.pdf]

Additional File

## **Spotting disease disrupts the microbiome of infected sea urchins**

Chloe G. Shaw, Christina Pavlouidi, Ryley S. Crow, Jimmy H. Saw, L. Courtney Smith

### **Supplementary Tables**

**Table S1.** Relative abundance of phyla on the global surface microbiome samples

**Table S2.** Genera with an average relative abundance  $> 0.1\%$  shown as the relative abundance per sample for the global surface microbiome samples

**Table S3.** Significantly differentially abundant taxa as identified by LEfSe for diseased and healthy global surface microbiome samples

**Table S4.** Relative abundance of phyla for the LBW and LS samples

**Table S5.** Genera with an average relative abundance of  $> 0.1\%$  in the LBW and LS microbiome samples

**Table S6.** Significantly differentially abundant taxa as identified by LEfSe for the LBW and LS microbiome samples

**Table S7.** Relative abundance of phyla in the tissue microbiome samples

**Table S8.** Genera with an average relative abundance of  $> 0.1\%$  in the tissue microbiome samples

**Table S9.** Significantly differentially abundance taxa as identified by LEfSe in the tissue microbiome samples

**Table S1.** Relative abundance of phyla on the global surface microbiome samples<sup>1</sup>

| <b>Phylum</b>     | <b>D1S</b>        | <b>D2S</b> | <b>D3S</b> | <b>D4S</b> | <b>H1S</b> | <b>H2S</b> | <b>H3S</b> | <b>H4S</b> | <b>fSW<sup>2</sup></b> |
|-------------------|-------------------|------------|------------|------------|------------|------------|------------|------------|------------------------|
| Verrucomicrobiota | 2.51 <sup>3</sup> | 5.53       | 13.19      | 7.33       | 35.49      | 16.62      | 4.83       | 4.14       | 13.31                  |
| Planctomycetota   | 1.13              | 0.97       | 5.37       | 4.62       | 7.92       | 10.98      | 1.71       | 2.36       | 24.68                  |
| Bacteroidota      | 53.32             | 42.19      | 5.37       | 61.12      | 10.69      | 10.39      | 0.47       | 2.51       | 2.40                   |
| Proteobacteria    | 42.66             | 33.89      | 75.75      | 26.37      | 43.69      | 60.53      | 92.72      | 90.41      | 58.63                  |
| Patescibacteria   | 0.38              | 15.35      | 0.00       | 0.25       | 0.78       | 1.19       | 0.23       | 0.18       | 0.13                   |
| Actinobacteriota  | 0.00              | 0.00       | 0.24       | 0.12       | 0.00       | 0.00       | 0.00       | 0.03       | 0.15                   |
| Firmicutes        | 0.00              | 0.00       | 0.00       | 0.00       | 0.00       | 0.00       | 0.00       | 0.00       | 0.00                   |
| Bacteria          | 0.00              | 0.97       | 0.08       | 0.18       | 0.11       | 0.15       | 0.00       | 0.03       | 0.70                   |
| Campylobacterota  | 0.00              | 1.11       | 0.00       | 0.00       | 0.17       | 0.00       | 0.04       | 0.12       | 0.00                   |
| Cyanobacteria     | 0.00              | 0.00       | 0.00       | 0.00       | 1.16       | 0.15       | 0.00       | 0.21       | 0.00                   |

<sup>1</sup>Abbreviations are: D, diseased animals 1-4; H, healthy animals 1-4; S; Surface, global surface microbiome samples. See also Table 1 in the main paper.

<sup>2</sup>Average of the taxa identified by filtering two sea water samples, fSW1 and fSW2.

<sup>3</sup>Percent relative abundance per sample.

**Table S2.** Genera with an average relative abundance > 0.1% shown as the relative abundance per sample for the global surface microbiome samples

| Species                       | D1S <sup>1</sup>  | D2S   | D3S   | D4S   | H1S   | H2S   | H3S   | H4S   | fSW <sup>1</sup> |
|-------------------------------|-------------------|-------|-------|-------|-------|-------|-------|-------|------------------|
| <i>Psychromonas</i>           | 4.77 <sup>2</sup> | 5.39  | 41.86 | 16.02 | 26.52 | 33.38 | 53.99 | 86.80 | 11.44            |
| HOC36                         | 29.86             | 4.15  | 6.08  | 3.14  | 7.09  | 2.67  | 2.06  | 0.98  | 42.76            |
| <i>Colwellia</i>              | 1.51              | 9.41  | 22.20 | 5.98  | 8.53  | 23.15 | 34.60 | 1.96  | 2.66             |
| Bacteroidia                   | 1.51              | 4.29  | 3.48  | 59.77 | 10.30 | 9.94  | 0.47  | 2.51  | 1.83             |
| Pir4 lineage                  | 0.88              | 0.97  | 5.29  | 4.62  | 3.93  | 6.38  | 1.71  | 1.62  | 23.67            |
| <i>Cyclobacteriaceae</i>      | 19.45             | 26.42 | 0.39  | 0.00  | 0.00  | 0.00  | 0.00  | 0.00  | 0.00             |
| BD2-3                         | 0.50              | 0.83  | 1.42  | 5.48  | 23.98 | 5.34  | 0.23  | 1.59  | 1.53             |
| <i>Cryomorphaceae</i>         | 24.72             | 5.81  | 1.26  | 0.00  | 0.39  | 0.30  | 0.00  | 0.00  | 0.57             |
| <i>Methylacidiphilaceae</i>   | 1.76              | 3.32  | 0.63  | 0.18  | 1.77  | 3.12  | 1.79  | 0.52  | 4.59             |
| JGI 0000069-P22               | 0.38              | 15.35 | 0.00  | 0.25  | 0.78  | 1.19  | 0.23  | 0.18  | 0.13             |
| <i>Rubritalea</i>             | 0.25              | 0.69  | 3.55  | 0.55  | 0.83  | 2.67  | 1.28  | 0.92  | 2.91             |
| <i>Persicirhabdus</i>         | 0.00              | 0.00  | 6.08  | 0.31  | 1.22  | 1.63  | 1.25  | 0.55  | 2.52             |
| MSBL3                         | 0.00              | 0.69  | 1.26  | 0.37  | 7.36  | 3.56  | 0.19  | 0.55  | 0.57             |
| <i>Lutibacter</i>             | 7.65              | 5.67  | 0.24  | 0.00  | 0.00  | 0.00  | 0.00  | 0.00  | 0.00             |
| vadinHA49                     | 0.25              | 0.00  | 0.00  | 0.00  | 3.99  | 4.60  | 0.00  | 0.74  | 1.00             |
| <i>Cellvibrionaceae</i>       | 3.64              | 5.67  | 1.18  | 0.00  | 0.39  | 0.00  | 0.00  | 0.00  | 0.00             |
| <i>Pseudoalteromonas</i>      | 0.00              | 0.00  | 2.92  | 0.06  | 0.50  | 0.74  | 1.60  | 0.31  | 0.22             |
| Gammaproteobacteria           | 1.13              | 0.28  | 0.32  | 0.12  | 0.33  | 0.30  | 0.23  | 0.12  | 1.55             |
| <i>Pseudoteredinibacter</i>   | 0.88              | 4.01  | 0.47  | 0.00  | 0.00  | 0.00  | 0.00  | 0.00  | 0.00             |
| <i>Pseudophaeobacter</i>      | 0.63              | 2.77  | 0.32  | 0.00  | 0.06  | 0.00  | 0.00  | 0.00  | 0.00             |
| <i>Chlamydiaceae</i>          | 0.00              | 0.00  | 0.24  | 0.43  | 0.33  | 0.30  | 0.08  | 0.00  | 1.19             |
| Bacteria <sup>3</sup>         | 0.00              | 0.97  | 0.08  | 0.18  | 0.11  | 0.15  | 0.00  | 0.03  | 0.70             |
| Candidatus <i>Photodesmus</i> | 0.13              | 0.41  | 0.00  | 0.80  | 0.06  | 0.15  | 0.00  | 0.03  | 0.00             |
| Gastranaerophilales           | 0.00              | 0.00  | 0.00  | 0.00  | 1.16  | 0.15  | 0.00  | 0.21  | 0.00             |
| Bacteroidales                 | 0.00              | 0.00  | 0.00  | 1.36  | 0.00  | 0.15  | 0.00  | 0.00  | 0.00             |
| <i>Rhodobacteraceae</i>       | 0.13              | 1.24  | 0.00  | 0.00  | 0.00  | 0.00  | 0.04  | 0.03  | 0.00             |
| <i>Halarcobacter</i>          | 0.00              | 1.11  | 0.00  | 0.00  | 0.17  | 0.00  | 0.04  | 0.12  | 0.00             |
| <i>Vibrio</i>                 | 0.00              | 0.55  | 0.16  | 0.25  | 0.00  | 0.00  | 0.08  | 0.00  | 0.00             |

<sup>1</sup>See Table S1 for definitions of abbreviations and Table 1 in the main paper.

<sup>2</sup>Percent relative abundance per sample.

<sup>3</sup>Bacteria denotes taxa that could not be assigned to a phylum.

**Table S3.** Significantly differentially abundant taxa as identified by LEfSe for diseased and healthy global surface microbiome samples

| Taxa                        | Enriched group | LDA score <sup>1</sup> | <i>p</i> value | <i>p</i> adjusted |
|-----------------------------|----------------|------------------------|----------------|-------------------|
| Gastranaerophilales         | Healthy        | 3.54322854             | 0.0472209      | 0.0472209         |
| Enterobacterales            | Healthy        | 3.18015404             | 0.03839358     | 0.03839358        |
| Cyclobacteriaceae           | Diseased       | 5.09216384             | 0.0472209      | 0.0472209         |
| <i>Lutibacter</i>           | Diseased       | 4.57012195             | 0.0472209      | 0.0472209         |
| <i>Pseudoteredinibacter</i> | Diseased       | 4.16907426             | 0.0472209      | 0.0472209         |

<sup>1</sup>The linear discriminant analysis (LDA) threshold was set to 2.

**Table S4.** Relative abundance of phyla for the LBW and LS samples

| Phylum                | D1 LBW <sup>1</sup> | D2a LBW | D2b LBW | D3 LBW | D1 LS | D2a LS | D2b LS | D3 LS | D4 LS | sSW <sup>1</sup> | fSW <sup>1</sup> |
|-----------------------|---------------------|---------|---------|--------|-------|--------|--------|-------|-------|------------------|------------------|
| Verrucomicrobiota     | 0.01 <sup>2</sup>   | 0.00    | 0.04    | 0.00   | 0.24  | 0.88   | 0.00   | 0.00  | 2.71  | 0.00             | 13.31            |
| Planctomycetota       | 0.01                | 0.00    | 0.22    | 0.00   | 0.00  | 4.05   | 0.00   | 0.22  | 0.81  | 0.00             | 24.68            |
| Bacteroidota          | 78.42               | 17.25   | 91.17   | 28.03  | 79.86 | 53.63  | 69.61  | 92.30 | 6.50  | 0.00             | 2.40             |
| Proteobacteria        | 21.36               | 80.77   | 7.88    | 68.17  | 19.62 | 40.66  | 25.43  | 7.48  | 88.89 | 76.99            | 58.63            |
| Patascibacteria       | 0.07                | 0.44    | 0.69    | 0.71   | 0.24  | 0.41   | 4.24   | 0.00  | 0.00  | 0.00             | 0.13             |
| Actinobacteriota      | 0.03                | 0.00    | 0.00    | 0.24   | 0.00  | 0.05   | 0.00   | 0.00  | 1.08  | 23.01            | 0.15             |
| Firmicutes            | 0.00                | 0.00    | 0.00    | 0.00   | 0.00  | 0.00   | 0.00   | 0.00  | 0.00  | 0.00             | 0.00             |
| Bacteria <sup>3</sup> | 0.00                | 0.00    | 0.00    | 0.00   | 0.00  | 0.00   | 0.00   | 0.00  | 0.00  | 0.00             | 0.70             |
| Campylobacterota      | 0.10                | 1.54    | 0.00    | 2.85   | 0.05  | 0.31   | 0.72   | 0.00  | 0.00  | 0.00             | 0.00             |
| Cyanobacteria         | 0.00                | 0.00    | 0.00    | 0.00   | 0.00  | 0.00   | 0.00   | 0.00  | 0.00  | 0.00             | 0.00             |

<sup>1</sup>Definitions of sample name abbreviations can be found in Table 1 in the main paper and Table S1.

<sup>2</sup>Percent relative abundance per sample.

<sup>3</sup>Bacteria denotes taxa that could not be assigned to a phylum.

**Table S5.** Genera with an average relative abundance of > 0.1% in the LBW and LS microbiome samples

| Species                       | D1<br>LBW <sup>1</sup> | D2a<br>LBW | D2b<br>LBW | D3<br>LBW | D1LS  | D2aLS | D2bLS | D3LS  | D4LS  | sSW   | fSW <sup>2</sup> |
|-------------------------------|------------------------|------------|------------|-----------|-------|-------|-------|-------|-------|-------|------------------|
| <i>Cyclobacteriaceae</i>      | 62.23 <sup>3</sup>     | 13.24      | 73.55      | 16.62     | 41.22 | 45.97 | 40.57 | 66.70 | 1.11  | 0.00  | 0.00             |
| <i>Cryomorphaceae</i>         | 15.43                  | 3.49       | 20.83      | 15.40     | 25.80 | 5.92  | 19.07 | 20.45 | 5.57  | 0.00  | 0.57             |
| Candidatus <i>Photodesmus</i> | 0.39                   | 47.45      | 1.88       | 39.65     | 0.00  | 0.47  | 0.16  | 0.00  | 0.00  | 0.00  | 0.00             |
| HOC36                         | 0.03                   | 0.00       | 0.05       | 0.00      | 0.67  | 1.77  | 0.57  | 1.70  | 22.28 | 8.52  | 42.76            |
| <i>Psychromonas</i>           | 10.29                  | 7.28       | 0.09       | 0.00      | 0.14  | 0.21  | 0.10  | 0.11  | 1.39  | 43.75 | 11.44            |
| <i>Cellvibrionaceae</i>       | 0.38                   | 0.19       | 0.40       | 0.00      | 9.19  | 30.08 | 7.08  | 1.93  | 20.06 | 22.44 | 0.00             |
| <i>Vibrio</i>                 | 0.64                   | 24.96      | 0.99       | 22.75     | 0.19  | 1.77  | 1.29  | 0.57  | 0.00  | 0.00  | 0.00             |
| Pir4 lineage                  | 0.01                   | 0.00       | 0.00       | 0.00      | 0.00  | 0.26  | 0.00  | 0.23  | 0.56  | 0.00  | 23.67            |
| <i>Pseudophaeobacter</i>      | 0.10                   | 0.05       | 0.00       | 0.00      | 3.54  | 2.08  | 8.06  | 0.34  | 31.48 | 1.42  | 0.00             |
| <i>Lutibacter</i>             | 2.03                   | 0.56       | 0.32       | 0.14      | 12.88 | 1.82  | 9.92  | 6.82  | 0.00  | 0.00  | 0.00             |
| <i>Pseudoteredinibacter</i>   | 1.81                   | 0.10       | 0.69       | 1.09      | 4.64  | 1.71  | 5.53  | 0.91  | 10.31 | 0.00  | 0.00             |
| <i>Microbacterium</i>         | 0.03                   | 0.00       | 0.00       | 0.27      | 0.00  | 0.05  | 0.00  | 0.00  | 1.11  | 23.01 | 0.07             |
| <i>Colwellia</i>              | 6.37                   | 0.41       | 0.00       | 0.00      | 0.86  | 0.57  | 0.67  | 0.00  | 1.67  | 0.00  | 2.66             |
| <i>Methylacidiphilaceae</i>   | 0.00                   | 0.00       | 0.00       | 0.00      | 0.00  | 0.16  | 0.00  | 0.00  | 0.00  | 0.00  | 4.59             |
| JGI 0000069-P22               | 0.07                   | 0.44       | 0.71       | 0.82      | 0.24  | 0.42  | 4.24  | 0.00  | 0.00  | 0.00  | 0.13             |
| <i>Halarcobacter</i>          | 0.11                   | 1.55       | 0.00       | 3.27      | 0.05  | 0.31  | 0.72  | 0.00  | 0.00  | 0.00  | 0.00             |
| <i>Rubritalea</i>             | 0.01                   | 0.00       | 0.00       | 0.00      | 0.24  | 0.10  | 0.00  | 0.00  | 1.11  | 0.00  | 2.91             |
| <i>Persicirhabdus</i>         | 0.00                   | 0.00       | 0.00       | 0.00      | 0.00  | 0.62  | 0.00  | 0.00  | 1.39  | 0.00  | 2.52             |
| Gammaproteobacteria           | 0.00                   | 0.00       | 0.00       | 0.00      | 0.05  | 0.00  | 0.00  | 0.11  | 1.11  | 0.85  | 1.55             |
| <i>Rhodobacteraceae</i>       | 0.00                   | 0.24       | 0.21       | 0.00      | 0.19  | 1.56  | 1.86  | 0.11  | 0.00  | 0.00  | 0.00             |
| <i>Gimesiaceae</i>            | 0.00                   | 0.00       | 0.23       | 0.00      | 0.00  | 3.79  | 0.00  | 0.00  | 0.28  | 0.00  | 0.00             |
| Bacteroidia                   | 0.00                   | 0.00       | 0.00       | 0.00      | 0.00  | 0.00  | 0.05  | 0.00  | 0.00  | 0.00  | 1.83             |
| BD2-3                         | 0.00                   | 0.00       | 0.00       | 0.00      | 0.00  | 0.00  | 0.00  | 0.00  | 0.00  | 0.00  | 1.53             |
| <i>Chlamydiaceae</i>          | 0.00                   | 0.00       | 0.04       | 0.00      | 0.00  | 0.00  | 0.00  | 0.00  | 0.28  | 0.00  | 1.19             |
| vadinHA49                     | 0.00                   | 0.00       | 0.00       | 0.00      | 0.00  | 0.00  | 0.00  | 0.00  | 0.00  | 0.00  | 1.00             |

<sup>1</sup>Definitions of sample name abbreviations can be found in Table 1 in the main paper and Table S1.

<sup>2</sup>Average of the taxa identified by filtering two sea water samples, fSW1 and fSW2.

<sup>3</sup>Percent relative abundance per sample.

**Table S6.** Significantly differentially abundant taxa as identified by LEFSe for the LBW and LS microbiome samples

| <b>Taxa</b>                   | <b>Enriched group</b> | <b>LDA score<sup>1</sup></b> | <b><i>p</i> value</b> | <b><i>p</i> adjusted</b> |
|-------------------------------|-----------------------|------------------------------|-----------------------|--------------------------|
| Cellvibrionaceae              | LS <sup>2</sup>       | 5.17687914                   | 0.00255609            | 0.00255609               |
| <i>Pseudophaeobacter</i>      | LS                    | 4.81626803                   | 0.00202884            | 0.00202884               |
| HOC36                         | LS                    | 4.70352662                   | 0.00202884            | 0.00202884               |
| Gammaproteobacteria           | LS                    | 3.55714684                   | 0.0145743             | 0.0145743                |
| <i>Roseobacter</i>            | LS                    | 3.27102339                   | 0.0145743             | 0.0145743                |
| Candidatus <i>Photodesmus</i> | LBW <sup>3</sup>      | 5.19269004                   | 0.01248356            | 0.01248356               |

<sup>1</sup>The linear discriminant analysis (LDA) threshold was set to 2.

<sup>2</sup>LS; Lesion surface samples.

<sup>3</sup>LBW; Lesion body wall samples.

**Table S7.** Relative abundance of phyla in the tissue microbiome samples

| Phylum            | D1 <sup>1</sup>   | D2a   | D2b   | D3    | D1    | D2    | D3    | D1    | D2    | D3    | D1    | D2    | D3    | H1    | H2    | H3    | H1    | H2    | H3    |
|-------------------|-------------------|-------|-------|-------|-------|-------|-------|-------|-------|-------|-------|-------|-------|-------|-------|-------|-------|-------|-------|
|                   | LBW               | LBW   | LBW   | LBW   | BW    | BW    | BW    | CF    | CF    | CF    | CF    | CF    | CF    | BW    | BW    | BW    | CF    | CF    | CF    |
| Verrucomicrobiota | 0.03 <sup>2</sup> | 0.00  | 0.04  | 0.00  | 0.06  | 0.25  | 0.00  | 0.00  | 0.00  | 0.00  | 1.25  | 0.01  | 20.80 | 12.34 | 19.87 | 0.00  | 37.41 | 0.00  | 0.00  |
| Planctomycetota   | 0.03              | 0.00  | 0.20  | 0.00  | 0.00  | 0.42  | 0.00  | 0.00  | 0.19  | 0.00  | 0.00  | 0.00  | 1.13  | 0.19  | 1.47  | 0.00  | 4.70  | 0.00  | 0.00  |
| Bacteroidota      | 56.86             | 14.32 | 90.93 | 28.03 | 2.68  | 3.30  | 0.00  | 4.35  | 9.49  | 3.32  | 0.43  | 12.51 | 9.40  | 3.70  | 13.91 | 33.36 | 3.70  | 13.91 | 33.36 |
| Proteobacteria    | 42.70             | 82.78 | 8.16  | 68.17 | 96.36 | 86.28 | 64.16 | 21.74 | 76.28 | 92.56 | 70.12 | 62.08 | 58.83 | 5.17  | 72.61 | 4.70  | 5.17  | 72.61 | 4.70  |
| Patescibacteria   | 0.13              | 0.48  | 0.67  | 0.71  | 0.10  | 3.02  | 0.00  | 0.00  | 8.81  | 0.00  | 0.00  | 0.00  | 0.00  | 0.00  | 0.00  | 0.05  | 0.00  | 0.00  | 0.05  |
| Actinobacteriota  | 0.05              | 0.00  | 0.00  | 0.24  | 0.10  | 5.45  | 1.51  | 0.00  | 4.26  | 2.68  | 18.97 | 3.49  | 16.78 | 6.35  | 13.48 | 19.69 | 6.35  | 13.48 | 19.69 |
| Firmicutes        | 0.00              | 0.00  | 0.00  | 0.00  | 0.12  | 0.00  | 33.47 | 73.91 | 0.10  | 0.00  | 10.46 | 0.00  | 63.43 | 0.00  | 0.00  | 0.00  | 63.43 | 0.00  | 0.00  |
| Bacteria          | 0.00              | 0.00  | 0.00  | 0.00  | 0.00  | 0.00  | 0.00  | 0.00  | 0.00  | 0.00  | 0.00  | 0.00  | 0.00  | 0.00  | 0.00  | 0.00  | 0.00  | 0.00  | 0.00  |
| Campylobacterota  | 0.21              | 2.41  | 0.00  | 2.85  | 0.59  | 1.29  | 0.87  | 0.00  | 0.87  | 0.19  | 0.00  | 0.00  | 0.00  | 0.01  | 0.00  | 0.10  | 0.01  | 0.00  | 0.10  |
| Cyanobacteria     | 0.00              | 0.00  | 0.00  | 0.00  | 0.00  | 0.00  | 0.00  | 0.00  | 0.00  | 0.00  | 0.00  | 0.00  | 2.45  | 0.00  | 0.00  | 0.00  | 0.00  | 0.00  | 0.00  |

<sup>1</sup>Definitions of sample name abbreviations can be found in Table 1 in the main paper and Table S1.

<sup>2</sup>Percent relative abundance per sample.

**Table S8.** Genera with an average relative abundance of > 0.1% in the tissue microbiome samples

| Species                     | D1                 |       |       | D2    |      |      | D3    |       |       | H1    |       |       | H2    |       |       | H3    |       |       |
|-----------------------------|--------------------|-------|-------|-------|------|------|-------|-------|-------|-------|-------|-------|-------|-------|-------|-------|-------|-------|
|                             | LBW <sup>1</sup>   | LBW   | CF    | LBW   | LBW  | CF   | LBW   | LBW   | CF    | LBW   | LBW   | CF    | LBW   | LBW   | CF    | LBW   | LBW   | CF    |
| <i>Psychromonas</i>         | 20.57 <sup>2</sup> | 11.40 | 0.08  | 0.00  | 0.00 | 0.00 | 36.17 | 81.01 | 1.73  | 8.55  | 24.95 | 6.47  | 9.09  | 58.84 | 3.93  | 1.87  | 64.00 | 4.08  |
| <i>Paenibacillus</i>        | 0.00               | 0.00  | 0.00  | 0.00  | 0.00 | 0.00 | 0.12  | 0.00  | 47.40 | 20.33 | 0.00  | 0.00  | 72.73 | 0.11  | 0.00  | 50.02 | 0.00  | 0.00  |
| <i>Microbacterium</i>       | 0.05               | 0.00  | 0.00  | 0.27  | 0.10 | 0.00 | 0.10  | 5.43  | 4.11  | 49.21 | 4.34  | 23.59 | 0.00  | 4.45  | 16.29 | 6.17  | 14.86 | 19.66 |
| Cyclobacteriaceae           | 24.51              | 10.59 | 73.01 | 16.62 | 0.00 | 0.00 | 0.65  | 1.33  | 0.00  | 0.00  | 0.00  | 0.00  | 0.00  | 3.00  | 0.00  | 0.00  | 0.00  | 0.00  |
| Cryomorphaceae              | 30.85              | 3.56  | 21.30 | 15.40 | 0.00 | 0.00 | 0.58  | 0.34  | 0.00  | 0.18  | 9.79  | 23.94 | 4.55  | 0.56  | 0.00  | 0.00  | 0.00  | 0.00  |
| <i>Colwellia</i>            | 12.73              | 0.65  | 0.00  | 0.00  | 0.00 | 0.00 | 58.37 | 0.34  | 0.00  | 0.00  | 0.00  | 0.00  | 4.55  | 0.56  | 0.00  | 0.00  | 0.00  | 0.49  |
| <i>Candidatus</i>           | 0.79               | 40.50 | 1.98  | 39.65 | 1.59 | 0.00 | 1.53  | 1.53  | 0.22  | 0.00  | 0.00  | 0.00  | 0.00  | 3.67  | 14.89 | 0.00  | 0.00  | 0.05  |
| <i>Photodesmus</i>          | 1.28               | 29.59 | 1.03  | 22.75 | 0.14 | 0.00 | 0.14  | 0.57  | 0.22  | 0.22  | 0.00  | 0.04  | 0.00  | 3.34  | 23.31 | 0.02  | 0.00  | 0.05  |
| <i>Vibrio</i>               | 0.00               | 0.00  | 0.00  | 0.00  | 0.00 | 0.00 | 0.00  | 0.00  | 0.00  | 0.02  | 20.16 | 13.62 | 0.00  | 0.00  | 0.00  | 19.40 | 0.00  | 27.86 |
| BD2-3                       | 0.00               | 0.00  | 0.00  | 0.00  | 0.00 | 0.00 | 2.04  | 0.00  | 0.00  | 1.15  | 17.63 | 13.82 | 0.00  | 0.00  | 0.00  | 3.74  | 5.71  | 33.28 |
| Bacteroidia                 | 0.00               | 0.00  | 0.00  | 0.00  | 0.00 | 0.00 | 0.00  | 0.00  | 0.00  | 16.23 | 6.14  | 0.00  | 4.55  | 0.00  | 0.00  | 14.00 | 0.00  | 0.00  |
| Paenibacillaceae            | 0.00               | 0.00  | 0.00  | 0.00  | 0.00 | 0.00 | 0.00  | 0.00  | 0.00  | 0.00  | 0.00  | 0.00  | 0.00  | 0.00  | 0.00  | 0.11  | 0.00  | 0.00  |
| <i>Bacillus</i>             | 0.76               | 0.08  | 0.37  | 0.00  | 0.00 | 0.00 | 0.06  | 0.00  | 0.00  | 4.52  | 11.02 | 3.56  | 0.00  | 1.56  | 0.28  | 2.24  | 0.00  | 0.00  |
| Cellvibrionaceae            | 0.00               | 0.00  | 0.00  | 0.00  | 0.00 | 0.00 | 0.00  | 0.00  | 0.00  | 0.00  | 9.59  | 2.85  | 0.00  | 0.00  | 0.00  | 0.69  | 0.00  | 9.55  |
| MSBL3                       | 0.14               | 0.49  | 0.70  | 0.82  | 0.10 | 0.00 | 0.10  | 3.06  | 0.00  | 0.00  | 0.00  | 0.00  | 0.00  | 10.12 | 0.00  | 0.00  | 0.00  | 0.05  |
| JGI 0000069-P22             | 0.22               | 2.43  | 0.00  | 3.27  | 0.59 | 0.00 | 0.59  | 1.27  | 0.00  | 0.00  | 0.00  | 0.00  | 0.00  | 1.00  | 1.40  | 0.01  | 0.00  | 0.10  |
| <i>Halarcobacter</i>        | 0.00               | 0.00  | 0.00  | 0.00  | 0.00 | 0.00 | 0.00  | 0.08  | 0.00  | 1.19  | 0.65  | 1.08  | 0.00  | 0.44  | 3.65  | 0.25  | 2.86  | 0.03  |
| <i>Brevibacterium</i>       | 0.03               | 0.00  | 0.00  | 0.00  | 0.00 | 0.00 | 0.00  | 0.00  | 0.00  | 0.00  | 0.00  | 0.00  | 0.00  | 0.00  | 9.27  | 0.00  | 0.00  | 0.00  |
| <i>Rubritalea</i>           | 0.11               | 0.00  | 0.00  | 0.00  | 0.00 | 0.00 | 0.00  | 2.21  | 0.00  | 0.00  | 0.00  | 5.48  | 0.00  | 1.22  | 0.00  | 0.00  | 0.00  | 0.00  |
| Rickettsiaceae              | 0.00               | 0.00  | 0.00  | 0.00  | 0.00 | 0.00 | 0.00  | 0.00  | 0.00  | 0.00  | 1.62  | 0.28  | 0.00  | 0.00  | 0.00  | 1.49  | 0.00  | 4.70  |
| vadinHA49                   | 3.62               | 0.16  | 0.70  | 1.09  | 0.00 | 0.00 | 0.00  | 0.00  | 0.00  | 0.00  | 0.00  | 0.00  | 0.00  | 1.45  | 0.56  | 0.00  | 0.00  | 0.00  |
| <i>Pseudoteredinibacter</i> | 0.00               | 0.00  | 0.00  | 0.00  | 0.00 | 0.00 | 0.00  | 0.00  | 0.00  | 7.17  | 0.00  | 0.00  | 0.00  | 0.00  | 0.00  | 0.00  | 0.00  | 0.00  |
| Proteobacteria              | 4.05               | 0.24  | 0.33  | 0.14  | 0.00 | 0.00 | 0.00  | 0.00  | 0.00  | 0.00  | 0.00  | 0.00  | 0.00  | 0.78  | 1.12  | 0.00  | 0.00  | 0.00  |
| <i>Lutibacter</i>           | 0.00               | 0.00  | 0.00  | 0.00  | 0.10 | 0.25 | 0.00  | 0.00  | 0.00  | 0.00  | 0.00  | 0.00  | 4.55  | 1.22  | 0.28  | 0.00  | 0.00  | 0.00  |
| <i>Pseudoaeromonas</i>      | 0.00               | 0.00  | 0.00  | 0.00  | 0.00 | 0.00 | 0.00  | 0.00  | 0.00  | 0.00  | 0.00  | 0.00  | 0.00  | 0.00  | 0.00  | 0.00  | 0.00  | 0.00  |

<sup>1</sup>Definitions of sample name abbreviations can be found in Table 1 in the main paper and Table S1.

<sup>2</sup>Percent relative abundance per sample.



**Table S9.** Significantly differentially abundance taxa as identified by LEfSe in the tissue microbiome samples

| <b>Taxa</b>                   | <b>Enriched group</b> | <b>LDA score<sup>1</sup></b> | <b><i>p</i> value</b> | <b><i>p</i> adjusted</b> |
|-------------------------------|-----------------------|------------------------------|-----------------------|--------------------------|
| <i>Pseudoalteromonas</i>      | DCF <sup>2</sup>      | 3.90070717                   | 0.00255785            | 0.00255785               |
| <i>Pseudophaeobacter</i>      | DCF                   | 3.2835783                    | 0.04218883            | 0.04218883               |
| <i>Microbacterium</i>         | HCF                   | 4.91327528                   | 0.00841746            | 0.00841746               |
| BD2-3                         | HCF                   | 4.89332032                   | 0.0094217             | 0.0094217                |
| Bacteroidia                   | HCF                   | 4.84050663                   | 0.01834497            | 0.01834497               |
| vadinHA49                     | HCF                   | 3.98707961                   | 0.04004801            | 0.04004801               |
| <i>Brevibacterium</i>         | HCF                   | 3.65176359                   | 0.00252176            | 0.00252176               |
| Cyclobacteriaceae             | LBW                   | 5.32451733                   | 0.0006317             | 0.0006317                |
| Candidatus <i>Photodesmus</i> | LBW                   | 4.83418387                   | 0.01436621            | 0.01436621               |
| Cryomorphaceae                | LBW                   | 4.76870085                   | 0.00726085            | 0.00726085               |
| <i>Vibrio</i>                 | LBW                   | 4.57190404                   | 0.0312891             | 0.0312891                |
| <i>Pseudoteredinibacter</i>   | LBW                   | 3.60968065                   | 0.00872441            | 0.00872441               |
| <i>Lutibacter</i>             | LBW                   | 3.55196684                   | 0.00872441            | 0.00872441               |

<sup>1</sup>The linear discriminant analysis (LDA) threshold was set to 2.

<sup>2</sup>Definitions of sample name abbreviations can be found in Table 1 in the main paper. For this table, definitions are: D, diseased; H, healthy; CF, coelomic fluid; LBW, lesion body wall.
